# Supplementary material for: From the Lab to the Field: Long-Distance Transport of Sterile Aedes Mosquitoes
Source: Insects. 2023 Feb 18;14(2):207. doi: 10.3390/insects14020207 (PMC9967802; doi:10.3390/insects14020207)
Supplement: Supplementary file 1 [file insects-14-00207-s001.zip › Supplementary Table S1.xlsx]

## Sheet: Sheet1
Supplementary Table S1: coefficients of the model analysis of the effects of marking, transport duration and time after unpacking on mosquito es cape rate
										Call:
										glm(formula = y ~ marking + pack_time + time_after_unpacking,
										family = "quasibinomial")
										Deviance Residuals:
										Min 1Q Median 3Q Max
										-6.5580 -1.5533 0.3205 1.8002 7.7987
	Estimate	Std. Error	t value	Pr(>|t|)
(Intercept)	3.1317	0.5239	5.978	1.88e-08	***					Coefficients: (1 not defined because of singularities)
Marking: 1	-0.3291	0.1028	-3.201	0.00171	**
Packing time: 0h_48h	-0.2194	0.6248	-0.351	0.72606
Packing time: 0h_72h	-0.681	0.6242	-1.091	0.27722
Packing time: 0h_96h	-0.8712	0.583	-1.494	0.13742
Packing time: 24h	-1.6361	0.5472	-2.99	0.00332	**
Packing time: 48h	-2.8683	0.5357	-5.354	3.56e-07	***
Packing time:72h	-3.8915	0.5387	-7.224	3.26e-11	***
Packing time: 96h	-4.133	0.5372	-7.693	2.61e-12	***
Time after unpacking: 24h	1.0934	0.1038	10.534	< 2e-16	***
Signif. codes: 0	‘***’ 0.001 ‘*	*’ 0.01 ‘*’	0.05 ‘.	’ 0.1 ‘ ’	1
